# Supplementary material for: A Model of Compound Heterozygous, Loss-of-Function Alleles Is Broadly Consistent with Observations from Complex-Disease GWAS Datasets
Source: PLoS Genet. 2017 Jan 19;13(1):e1006573. doi: 10.1371/journal.pgen.1006573 (PMC5289629; doi:10.1371/journal.pgen.1006573)
Supplement: S1 Table — This table contains information specifying the empirical studies used in the manuscript. The data were obtained from the NHGRI-EBI catalog of published genome-wide association studies. All information fields contained in the download of the GWAS catalog are presented here. (XLSX) [file pgen.1006573.s025.xlsx]

## Sheet: Sheet1
Date Added to Catalog	PUBMEDID	First Author	Date	Journal	Link	Study	Disease/Trait	Initial Sample Description	Replication Sample Description
2010-05-06	20385826	Neale BM	2010-04-12	Proc Natl Acad Sci U S A	http://www.ncbi.nlm.nih.gov/pubmed/20385826	Genome-wide association study of advanced age-related macular degeneration identifies a role of the hepatic lipase gene (LIPC).	Age-related macular degeneration	979 cases, 1,709 controls	868 European ancestry cases, 410 European ancestry controls, 4,921 cases, 3,824 controls
2011-06-29	21665990	Yu Y	2011-06-10	Hum Mol Genet	http://www.ncbi.nlm.nih.gov/pubmed/21665990	Common variants near FRK/COL10A1 and VEGFA are associated with advanced age-related macular degeneration.	Age-related macular degeneration	2,594 European ancestry cases, 4,134 European ancestry controls	5,640 European ancestry cases, 52,174 European ancestry controls
2011-10-05	21909106	Arakawa S	2011-09-11	Nat Genet	http://www.ncbi.nlm.nih.gov/pubmed/21909106	Genome-wide association study identifies two susceptibility loci for exudative age-related macular degeneration in the Japanese population.	Age-related macular degeneration	827 Japanese ancestry cases, 3,323 Japanese ancestry controls	709 Japanese ancestry cases, 15,571 Japanese ancestry controls
2012-08-08	22694956	Cipriani V	2012-06-13	Hum Mol Genet	http://www.ncbi.nlm.nih.gov/pubmed/22694956	Genome-wide association study of age-related macular degeneration identifies associated variants in the TNXB-FKBPL-NOTCH4 region of chromosome 6p21.3.	Age-related macular degeneration	893 European ancestry cases, 2,199 European ancestry controls	1,411 European ancestry cases, 1,431 European ancestry controls
2013-04-19	23326517	Holliday EG	2013-01-11	PLoS One	http://www.ncbi.nlm.nih.gov/pubmed/23326517	Insights into the genetic architecture of early stage age-related macular degeneration: a genome-wide association study meta-analysis.	Age-related macular degeneration	3,772 European ancestry cases, 16,033 European ancestry controls	264 Asian ancestry cases, 3,926 Asian ancestry controls
2013-06-18	23536807	Scheetz TE	2013-03-11	PLoS One	http://www.ncbi.nlm.nih.gov/pubmed/23536807	A genome-wide association study for primary open angle glaucoma and macular degeneration reveals novel Loci.	Age-related macular degeneration	200 cases, 197 controls	200 cases, 200 controls
2013-07-31	23455636	Fritsche LG	2013-03-03	Nat Genet	http://www.ncbi.nlm.nih.gov/pubmed/23455636	Seven new loci associated with age-related macular degeneration.	Age-related macular degeneration	6,713 European ancestry cases, 48,402 European ancestry contols, 110 Southern Indian ancestry cases, 119 Southern Indian ancestry controls, 827 Japanese ancestry cases, 3,323 Japanese ancestry controls	9,070 European ancestry cases, 7,683 European ancestry contols, 461 East Asian ancestry cases, 547 East Asian ancestry controls
2013-11-16	23577725	Naj AC	2013-05-01	Ann Hum Genet	http://www.ncbi.nlm.nih.gov/pubmed/23577725	Genetic factors in nonsmokers with age-related macular degeneration revealed through genome-wide gene-environment interaction analysis.	Age-related macular degeneration	1,207 European ancestry cases, 686 European ancestry controls	122 European ancestry cases, 86 European ancestry controls
2014-07-01	20385819	Chen W	2010-04-12	Proc Natl Acad Sci U S A	http://www.ncbi.nlm.nih.gov/pubmed/20385819	Genetic variants near TIMP3 and high-density lipoprotein-associated loci influence susceptibility to age-related macular degeneration.	Age-related macular degeneration	2,157 European ancestry cases, 1,150 European ancestry controls	7,892 European ancestry cases, 5,998 European ancestry controls, 678 Japanese ancestry cases, 336 Japanese ancestry controls
2010-02-02	20062062	Reveille JD	2010-01-10	Nat Genet	http://www.ncbi.nlm.nih.gov/pubmed/20062062?itool=EntrezSystem2.PEntrez.Pubmed.Pubmed_ResultsPanel.Pubmed_RVDocSum&ordinalpos=1	Genome-wide association study of ankylosing spondylitis identifies non-MHC susceptibility loci.	Ankylosing spondylitis	2,053 European ancestry cases, 5,140 European ancestry controls	898 European ancestry cases, 1,518 European ancestry controls
2011-07-30	21743469	Evans DM	2011-07-10	Nat Genet	http://www.ncbi.nlm.nih.gov/pubmed/21743469	Interaction between ERAP1 and HLA-B27 in ankylosing spondylitis implicates peptide handling in the mechanism for HLA-B27 in disease susceptibility.	Ankylosing spondylitis	3,023 European ancestry cases, 8,779 European ancestry controls	2,111 European ancestry cases, 4,483 European ancestry controls
2012-01-04	22138694	Lin Z	2011-12-04	Nat Genet	http://www.ncbi.nlm.nih.gov/pubmed/22138694	A genome-wide association study in Han Chinese identifies new susceptibility loci for ankylosing spondylitis.	Ankylosing spondylitis	1,837 Han Chinese ancestry cases, 4,231 Han Chinese ancestry controls	2,100 Han Chinese ancestry cases, 3,496 Han Chinese ancestry controls
2008-11-25	17611496	Moffatt MF	2007-07-26	Nature	http://www.ncbi.nlm.nih.gov/pubmed/17611496	Genetic variants regulating ORMDL3 expression contribute to the risk of childhood asthma.	Asthma	994 European ancestry cases, 1,243 European ancestry controls	200 European ancestry cases, 2,120 European ancestry controls
2009-05-20	19426955	Himes BE	2009-05-07	Am J Hum Genet	http://www.ncbi.nlm.nih.gov/pubmed/19426955?ordinalpos=1&itool=EntrezSystem2.PEntrez.Pubmed.Pubmed_ResultsPanel.Pubmed_DefaultReportPanel.Pubmed_RVDocSum	Genome-wide association analysis identifies PDE4D as an asthma-susceptibility gene.	Asthma	359 European ancestry cases, 846 European ancestry controls	2,981 European ancestry cases, 12,358 European ancestry controls, 769 European ancestry and hispanic cases, 1,007 European ancestry and hispanic controls, 592 Hispanic cases with their 1,184 Hispanic parental controls, 2,258 African American cases, 3,006 African American controls
2010-01-13	20032318	Sleiman PM	2009-12-23	N Engl J Med	http://www.ncbi.nlm.nih.gov/pubmed/20032318?itool=EntrezSystem2.PEntrez.Pubmed.Pubmed_ResultsPanel.Pubmed_RVDocSum&ordinalpos=1	Variants of DENND1B associated with asthma in children.	Asthma	793 European ancestry cases, 1,988 European ancestry controls	917 European ancestry cases, 1,546 European ancestry controls, 1,667 African American cases, 2,045 African American controls
2010-03-05	20159242	Li X	2010-02-01	J Allergy Clin Immunol	http://www.ncbi.nlm.nih.gov/pubmed/20159242?itool=EntrezSystem2.PEntrez.Pubmed.Pubmed_ResultsPanel.Pubmed_RVDocSum&ordinalpos=1	Genome-wide association study of asthma identifies RAD50-IL13 and HLA-DR/DQ regions.	Asthma	607 European ancestry cases, 3,294 European ancestry controls	NA
2010-10-14	20860503	Moffatt MF	2010-09-23	N Engl J Med	http://www.ncbi.nlm.nih.gov/pubmed/20860503	A large-scale, consortium-based genomewide association study of asthma.	Asthma	10,365 cases, 16,110 controls	NA
2011-01-11	21150878	Ferreira MA	2010-12-08	Eur J Hum Genet	http://www.ncbi.nlm.nih.gov/pubmed/21150878	Association between ORMDL3, IL1RL1 and a deletion on chromosome 17q21 with asthma risk in Australia.	Asthma	986 European ancestry cases, 1,846 European ancestry controls	391 European ancestry cases, 213 European ancestry controls
2011-08-27	21804548	Hirota T	2011-07-31	Nat Genet	http://www.ncbi.nlm.nih.gov/pubmed/21804548	Genome-wide association study identifies three new susceptibility loci for adult asthma in the Japanese population.	Asthma	1,532 Japanese ancestry cases, 3,304 Japanese ancestry controls	5,639 Japanese ancestry cases, 24,608 Japanese ancestry controls
2011-09-02	21814517	Noguchi E	2011-07-21	PLoS Genet	http://www.ncbi.nlm.nih.gov/pubmed/21814517	Genome-wide association study identifies HLA-DP as a susceptibility gene for pediatric asthma in Asian populations.	Asthma	938 Japanese ancestry cases, 2,376 Japanese ancestry controls	1653 East Asian ancestry cases, 1453 East Asian ancestry controls
2011-09-30	21907864	Ferreira MA	2011-09-10	Lancet	http://www.ncbi.nlm.nih.gov/pubmed/21907864	Identification of IL6R and chromosome 11q13.5 as risk loci for asthma.	Asthma	12,475 European ancestry cases, 19,967 European ancestry controls	3,322 European ancestry cases, 22,036 European ancestry controls
2012-12-07	23028483	Ramasamy A	2012-09-28	PLoS One	http://www.ncbi.nlm.nih.gov/pubmed/23028483	Genome-wide association studies of asthma in population-based cohorts confirm known and suggested loci and identify an additional association near HLA.	Asthma	1,716 European ancestry cases, 16,888 European ancestry controls	4,035 European ancestry cases, 11,251 European ancestry controls
2008-11-25	18711365	Ferreira MA	2008-08-17	Nat Genet	http://www.ncbi.nlm.nih.gov/pubmed/18711365?ordinalpos=4&itool=EntrezSystem2.PEntrez.Pubmed.Pubmed_ResultsPanel.Pubmed_RVDocSum	Collaborative genome-wide association analysis supports a role for ANK3 and CACNA1C in bipolar disorder.	Bipolar disorder	4,387 European ancestry cases, 6,209 European ancestry controls	NA
2008-11-25	17554300	WTCCC	2007-06-07	Nature	http://www.ncbi.nlm.nih.gov/pubmed/17554300	Genome-wide association study of 14,000 cases of seven common diseases and 3,000 shared controls.	Bipolar disorder	1,868 European ancestry cases, 2,938 European ancestry controls	NA
2008-11-25	17486107	Baum AE	2007-05-08	Mol Psychiatry	http://www.ncbi.nlm.nih.gov/pubmed/17486107?ordinalpos=2&itool=EntrezSystem2.PEntrez.Pubmed.Pubmed_ResultsPanel.Pubmed_RVDocSum	A genome-wide association study implicates diacylglycerol kinase eta (DGKH) and several other genes in the etiology of bipolar disorder.	Bipolar disorder	461 European ancestry cases, 563 European ancestry controls	772 European ancestry cases, 876 European ancestry controls
2009-05-14	19416921	Scott LJ	2009-05-05	Proc Natl Acad Sci U S A	http://www.ncbi.nlm.nih.gov/pubmed/19416921?ordinalpos=1&itool=EntrezSystem2.PEntrez.Pubmed.Pubmed_ResultsPanel.Pubmed_DefaultReportPanel.Pubmed_RVDocSum	Genome-wide association and meta-analysis of bipolar disorder in individuals of European ancestry.	Bipolar disorder	3,683 European ancestry cases, 14,507 European ancestry controls	NA
2009-06-16	19488044	Smith EN	2009-06-02	Mol Psychiatry	http://www.ncbi.nlm.nih.gov/pubmed/19488044	Genome-wide association study of bipolar disorder in European American and African American individuals.	Bipolar disorder	1,001 European ancestry cases, 1,033 European ancestry controls, 345 African American cases, 670 African American controls	1,550 European ancestry individuals from 250 families, 1,263 European ancestry cases, 431 European ancestry controls
2011-04-06	21353194	Cichon S	2011-02-23	Am J Hum Genet	http://www.ncbi.nlm.nih.gov/pubmed/21353194	Genome-wide association study identifies genetic variation in neurocan as a susceptibility factor for bipolar disorder.	Bipolar disorder	682 European ancestry cases, 1,300 European ancestry controls	7,759 European ancestry cases, 34,062 European ancestry controls
2011-09-03	21771265	Yosifova A	2011-07-19	Genes Brain Behav	http://www.ncbi.nlm.nih.gov/pubmed/21771265	Genome-wide association study on bipolar disorder in the Bulgarian population.	Bipolar disorder	188 Bulgarian ancestry cases, 376 Bulgarian ancestry controls	122 Bulgarian ancestry cases, 328 Bulgarian ancestry controls
2012-11-19	22925353	Lee HJ	2012-08-25	J Affect Disord	http://www.ncbi.nlm.nih.gov/pubmed/22925353	A genome-wide association study of seasonal pattern mania identifies NF1A as a possible susceptibility gene for bipolar disorder.	Bipolar disorder	2,191 European ancestry cases, 1,434 European ancestry controls	NA
2010-05-07	20386566	Lee MT	2010-04-13	Mol Psychiatry	http://www.ncbi.nlm.nih.gov/pubmed/20386566	Genome-wide association study of bipolar I disorder in the Han Chinese population.	Bipolar I disorder	1,000 Han Chinese ancestry cases, 1,000 Han Chinese ancestry controls	409 Han Chinese ancestry cases, 1,000 Han Chinese ancestry controls
2008-11-25	18463975	Kibriya MG	2008-05-08	Breast Cancer Res Treat	http://www.ncbi.nlm.nih.gov/pubmed/18463975?ordinalpos=1&itool=EntrezSystem2.PEntrez.Pubmed.Pubmed_ResultsPanel.Pubmed_DefaultReportPanel.Pubmed_RVDocSum	A pilot genome-wide association study of early-onset breast cancer.	Breast cancer	26 European ancestry cases, 3 Hispanic cases, 1 African American cases, 26 European ancestry controls, 3 Hispanic controls, 1 African American control	NA
2008-11-25	18326623	Gold B	2008-03-11	Proc Natl Acad Sci U S A	http://www.ncbi.nlm.nih.gov/pubmed/18326623	Genome-wide association study provides evidence for a breast cancer risk locus at 6q22.33.	Breast cancer	249 Ashkenazi Jewish ancestry non-BRCA1/2 carriers cases, 299 Ashkenazi Jewish ancestry non-BRCA1/2 carriers controls	1,193 Ashkenazi Jewish ancestry non-BRCA1/2 carriers cases,1,166 Ashkenazi Jewish ancestry non-BRCA1/2 carriers controls
2008-11-25	17529967	Easton DF	2007-05-27	Nature	http://www.ncbi.nlm.nih.gov/pubmed/17529967	Genome-wide association study identifies novel breast cancer susceptibility loci.	Breast cancer	390 cases,364 controls	26,646 cases,24,889 controls
2008-11-25	17529973	Hunter DJ	2007-05-27	Nat Genet	http://www.ncbi.nlm.nih.gov/pubmed/17529973?ordinalpos=1&itool=EntrezSystem2.PEntrez.Pubmed.Pubmed_ResultsPanel.Pubmed_RVDocSum	A genome-wide association study identifies alleles in FGFR2 associated with risk of sporadic postmenopausal breast cancer.	Breast cancer	1,145 European ancestry cases, 1,142 European ancestry controls	874 European ancestry cases, 1,478 European ancestry controls, 302 cases, 594 controls
2008-11-25	17529974	Stacey SN	2007-05-27	Nat Genet	http://www.ncbi.nlm.nih.gov/pubmed/17529974?ordinalpos=1&itool=EntrezSystem2.PEntrez.Pubmed.Pubmed_ResultsPanel.Pubmed_RVDocSum	Common variants on chromosomes 2q35 and 16q12 confer susceptibility to estrogen receptor-positive breast cancer.	Breast cancer	1,599 European ancestry cases, 11,546 European ancestry controls	2,954 European ancestry cases, 5,967 European ancestry controls, Up to 561 Japanese ancestry cases, Up to 565 Japanese ancestry control, Up to 422 African American cases, Up to 448 African American controls, Up to 418 Hispanic cases, Up to 422 Hispanic controls, Up to 148 cases, Up to 293 controls
2009-02-28	19219042	Zheng W	2009-02-15	Nat Genet	http://www.ncbi.nlm.nih.gov/pubmed/19219042	Genome-wide association study identifies a new breast cancer susceptibility locus at 6q25.1.	Breast cancer	1,505 Chinese ancestry cases, 1,522 Chinese ancestry controls	5,026 Chinese ancestry cases, 2,476 Chinese ancestry controls, 1,591 European ancestry cases, 1,466 European ancestry controls
2009-04-03	19330030	Thomas G	2009-03-29	Nat Genet	http://www.ncbi.nlm.nih.gov/pubmed/19330030?ordinalpos=3&itool=EntrezSystem2.PEntrez.Pubmed.Pubmed_ResultsPanel.Pubmed_DefaultReportPanel.Pubmed_RVDocSum	A multistage genome-wide association study in breast cancer identifies two new risk alleles at 1p11.2 and 14q24.1 (RAD51L1).	Breast cancer	1,145 European ancestry cases, 1,142 European ancestry controls	8,625 European ancestry cases, 9,657 European ancestry controls
2010-06-02	20453838	Turnbull C	2010-05-09	Nat Genet	http://www.ncbi.nlm.nih.gov/pubmed/20453838	Genome-wide association study identifies five new breast cancer susceptibility loci.	Breast cancer	3,659 European ancestry cases, 4,897 European ancestry controls	12,576 European ancestry cases, 12,223 European ancestry controls
2010-07-12	20585626	Long J	2010-06-24	PLoS Genet	http://www.ncbi.nlm.nih.gov/pubmed/20585626	Identification of a functional genetic variant at 16q12.1 for breast cancer risk: results from the Asia Breast Cancer Consortium.	Breast cancer	2,073 Chinese ancestry cases, 2,084 Chinese ancestry controls	15,159 East Asian ancestry cases, 12,993 East Asian ancestry controls, 2,797 European ancestry cases, 2,662 European ancestry controls
2010-10-07	20852631	Antoniou AC	2010-09-19	Nat Genet	http://www.ncbi.nlm.nih.gov/pubmed/20852631	A locus on 19p13 modifies risk of breast cancer in BRCA1 mutation carriers and is associated with hormone receptor-negative breast cancer in the general population.	Breast cancer	1,193 European ancestry cases, 1,190 European ancestry controls	2,974 European ancestry cases, 3,012 European ancestry controls
2010-10-15	20872241	Li J	2010-09-26	Breast Cancer Res Treat	http://www.ncbi.nlm.nih.gov/pubmed/20872241	A combined analysis of genome-wide association studies in breast cancer.	Breast cancer	2,702 European ancestry female cases, 5,726 European ancestry controls	Up to 7,386 cases, 7,576 controls
2011-03-04	21263130	Fletcher O	2011-01-24	J Natl Cancer Inst	http://www.ncbi.nlm.nih.gov/pubmed/21263130	Novel breast cancer susceptibility locus at 9q31.2: results of a genome-wide association study.	Breast cancer	2,839 European ancestry cases, 3,507 European ancestry controls	9,041 European ancestry cases, 8,980 European ancestry controls
2011-04-13	21424380	Sehrawat B	2011-03-19	Hum Genet	http://www.ncbi.nlm.nih.gov/pubmed/21424380	Potential novel candidate polymorphisms identified in genome-wide association study for breast cancer susceptibility.	Breast cancer	302 European ancestry female cases, 321 European ancestry female controls	1,153 European ancestry female cases, 1,215 European ancestry female controls
2011-09-30	21908515	Cai Q	2011-09-09	Hum Mol Genet	http://www.ncbi.nlm.nih.gov/pubmed/21908515	Genome-wide association study identifies breast cancer risk variant at 10q21.2: results from the Asia Breast Cancer Consortium.	Breast cancer	2,062 East Asian ancestry cases, 2,066 East Asian ancestry controls	15,091 East Asian ancestry cases, 14,877 East Asian ancestry controls
2011-11-24	22037553	Haiman CA	2011-10-30	Nat Genet	http://www.ncbi.nlm.nih.gov/pubmed/22037553	A common variant at the TERT-CLPTM1L locus is associated with estrogen receptor-negative breast cancer.	Breast cancer	1,004 African American cases, 2,745 African American controls,1,718 European ancestry cases, 3,670 European ancestry controls	2,292 European ancestry cases, 16,901 European ancestry controls
2012-03-17	22383897	Long J	2012-02-23	PLoS Genet	http://www.ncbi.nlm.nih.gov/pubmed/22383897	Genome-wide association study in east Asians identifies novel susceptibility loci for breast cancer.	Breast cancer	2,918 Chinese ancestry cases, 2,324 Chinese ancestry controls	up to 16,173 East Asian ancestry cases, up to 18,282 East Asian ancestry controls
2012-04-28	22452962	Kim HC	2012-03-27	Breast Cancer Res	http://www.ncbi.nlm.nih.gov/pubmed/22452962	A genome-wide association study identifies a breast cancer risk variant in ERBB4 at 2q34: results from the Seoul Breast Cancer Study.	Breast cancer	2,273 Korean ancestry cases, 2,052 Korean ancestry controls	4,049 Korean ancestry cases, 3,845 Korean ancestry controls
2012-10-13	22923054	Chen F	2012-08-25	Hum Genet	http://www.ncbi.nlm.nih.gov/pubmed/22923054	A genome-wide association study of breast cancer in women of African ancestry.	Breast cancer	3,016 African American cases, 2,745 African American controls	3,533 African ancestry cases, 11,046 African ancestry controls
2012-11-06	22951594	Elgazzar S	2012-09-06	J Hum Genet	http://www.ncbi.nlm.nih.gov/pubmed/22951594	A genome-wide association study identifies a genetic variant in the SIAH2 locus associated with hormonal receptor-positive breast cancer in Japanese.	Breast cancer	1,086 Japanese ancestry cases, 1,816 Japanese ancestry controls	1,653 Japanese ancestry cases, 2,797 Japanese ancestry controls
2012-11-30	22976474	Siddiq A	2012-09-13	Hum Mol Genet	http://www.ncbi.nlm.nih.gov/pubmed/22976474	A meta-analysis of genome-wide association studies of breast cancer identifies two novel susceptibility loci at 6q14 and 20q11.	Breast cancer	3,666 European ancestry cases, 28,864 European ancestry controls, 1,004 African American cases, 2,744 African American controls	562 European ancestry cases, 6,410 European ancestry controls, 84 Japanese ancestry cases, 830 Japanese ancestry controls, 300 Latino cases, 1,164 Latino controls
2013-04-24	23354978	Rinella ES	2013-01-25	Hum Genet	http://www.ncbi.nlm.nih.gov/pubmed/23354978	Genetic variants associated with breast cancer risk for Ashkenazi Jewish women with strong family histories but no identifiable BRCA1/2 mutation.	Breast cancer	477 Ashkenazi Jewish cases, 524 Ashkenazi Jewish controls	203 Ashkenazi Jewish cases, 263 Ashkenazi Jewish contols
2013-06-06	23468962	Song C	2013-02-28	PLoS One	http://www.ncbi.nlm.nih.gov/pubmed/23468962	A genome-wide scan for breast cancer risk haplotypes among African American women.	Breast cancer	3,016 African American cases; 2,745 African American controls
2013-09-12	23535733	Garcia-Closas M	2013-04-01	Nat Genet	http://www.ncbi.nlm.nih.gov/pubmed/23535733	Genome-wide association studies identify four ER negative-specific breast cancer risk loci.	Breast cancer	4,193 European ancestry cases, 35,194 European ancestry controls	6,514 European ancestry cases, 41,455 European ancestry controls
2013-09-12	23535729	Michailidou K	2013-04-01	Nat Genet	http://www.ncbi.nlm.nih.gov/pubmed/23535729	Large-scale genotyping identifies 41 new loci associated with breast cancer risk.	Breast cancer	10,052 European ancestry cases, 12,575 European ancestry controls	45,290 European ancestry cases, 41,880 European ancestry controls
2014-04-10	24143190	Low SK	2013-10-15	PLoS One	http://www.ncbi.nlm.nih.gov/pubmed/24143190	Genome-wide association study of breast cancer in the Japanese population.	Breast cancer	2,642 Japanese ancestry cases, 2,099 Japaneses ancestry controls	2,885 Japanese ancestry cases, 3,395 Japaneses ancestry controls
2008-11-25	18311140	Hunt KA	2008-03-02	Nat Genet	http://www.ncbi.nlm.nih.gov/pubmed/18311140?ordinalpos=7&itool=EntrezSystem2.PEntrez.Pubmed.Pubmed_ResultsPanel.Pubmed_RVDocSum	Newly identified genetic risk variants for celiac disease related to the immune response.	Celiac disease	767 European ancestry cases, 1,422 European ancestry controls	1,643 European ancestry cases, 3,406 European ancestry controls
2008-11-25	17558408	van Heel DA	2007-06-10	Nat Genet	http://www.ncbi.nlm.nih.gov/pubmed/17558408?ordinalpos=4&itool=EntrezSystem2.PEntrez.Pubmed.Pubmed_ResultsPanel.Pubmed_RVDocSum	A genome-wide association study for celiac disease identifies risk variants in the region harboring IL2 and IL21.	Celiac disease	778 European ancestry cases, 1,422 European ancestry controls	991 European ancestry cases, 1,489 European ancestry controls
2010-03-29	20190752	Dubois PC	2010-02-28	Nat Genet	http://www.ncbi.nlm.nih.gov/pubmed/20190752	Multiple common variants for celiac disease influencing immune gene expression.	Celiac disease	4,533 European ancestry cases, 10,750 European ancestry controls	4,918 European ancestry cases, 5,684 European ancestry controls
2010-05-05	20383146	Kottgen A	2010-04-11	Nat Genet	http://www.ncbi.nlm.nih.gov/pubmed/20383146	New loci associated with kidney function and chronic kidney disease.	Chronic kidney disease	Up to 67,093 European ancestry individuals	Up to 22,982 European ancestry individuals
2014-08-05	24351856	Nanayakkara S	2013-12-18	J Occup Health	http://www.ncbi.nlm.nih.gov/pubmed/24351856	An integrative study of the genetic, social and environmental determinants of chronic kidney disease characterized by tubulointerstitial damages in the North Central Region of Sri Lanka.	Chronic kidney disease	301 Sinhalese Sri Lankan ancestry cases, 276 Sinhalese Sri Lankan ancestry controls	NA
2008-11-25	17634449	Samani NJ	2007-07-18	N Engl J Med	http://www.ncbi.nlm.nih.gov/pubmed/17634449?ordinalpos=2&itool=EntrezSystem2.PEntrez.Pubmed.Pubmed_ResultsPanel.Pubmed_RVDocSum	Genomewide association analysis of coronary artery disease.	Coronary heart disease	1,926 European ancestry cases, 2,938 European ancestry controls	875 European ancestry cases, 1,644 European ancestry controls
2008-11-25	17554300	WTCCC	2007-06-07	Nature	http://www.ncbi.nlm.nih.gov/pubmed/17554300?ordinalpos=5&itool=EntrezSystem2.PEntrez.Pubmed.Pubmed_ResultsPanel.Pubmed_RVDocSum	Genome-wide association study of 14,000 cases of seven common diseases and 3,000 shared controls.	Coronary heart disease	1,926 European ancestry cases, 2,938 European ancestry controls	(see Samani 2007)
2009-03-01	19198612	Erdmann J	2009-02-08	Nat Genet	http://www.ncbi.nlm.nih.gov/pubmed/19198612?ordinalpos=1&itool=EntrezSystem2.PEntrez.Pubmed.Pubmed_ResultsPanel.Pubmed_DefaultReportPanel.Pubmed_RVDocSum	New susceptibility locus for coronary artery disease on chromosome 3q22.3.	Coronary heart disease	1,222 European ancestry cases, 1,298 European ancestry controls	18,185 European ancestry cases, 20,068 European ancestry controls
2009-04-01	19198611	Tregouet DA	2009-02-08	Nat Genet	http://www.ncbi.nlm.nih.gov/pubmed/19198611?ordinalpos=2&itool=EntrezSystem2.PEntrez.Pubmed.Pubmed_ResultsPanel.Pubmed_DefaultReportPanel.Pubmed_RVDocSum	Genome-wide haplotype association study identifies the SLC22A3-LPAL2-LPA gene cluster as a risk locus for coronary artery disease.	Coronary heart disease	1,926 European ancestry cases, 2,938 European ancestry controls	7,073 European ancestry cases, 7,325 European ancestry controls
2011-01-06	21088011	Erdmann J	2010-11-18	Eur Heart J	http://www.ncbi.nlm.nih.gov/pubmed/21088011	Genome-wide association study identifies a new locus for coronary artery disease on chromosome 10p11.23.	Coronary heart disease	1,157 European ancestry cases, 1,748 European ancestry controls	7,887 European ancestry cases, 8,244 European ancestry controls
2011-02-23	21239051	Reilly MP	2011-01-14	Lancet	http://www.ncbi.nlm.nih.gov/pubmed/21239051	Identification of ADAMTS7 as a novel locus for coronary atherosclerosis and association of ABO with myocardial infarction in the presence of coronary atherosclerosis: two genome-wide association studies.	Coronary heart disease	1,808 European ancestry AngCAD cases, 915 European ancestry controls, 4,572 European ancestry AngCAD with MI cases, 2,739 European ancestry AngCAD without MI controls	10,585 European ancestry AngCAD cases, 6,468 European ancestry controls, 1,211 European ancestry AngCAD with MI cases, 905 European ancestry AngCAD without MI controls
2011-04-07	21347282	Lettre G	2011-02-10	PLoS Genet	http://www.ncbi.nlm.nih.gov/pubmed/21347282	Genome-wide association study of coronary heart disease and its risk factors in 8,090 African Americans: the NHLBI CARe Project.	Coronary heart disease	8,090 African American individuals	8,849 African American or African-Caribbean ancestry individuals
2011-04-11	21378990	Schunkert H	2011-03-06	Nat Genet	http://www.ncbi.nlm.nih.gov/pubmed/21378990	Large-scale association analysis identifies 13 new susceptibility loci for coronary artery disease.	Coronary heart disease	22,233 European ancestry cases, 64,762 European ancestry controls	56,682 European ancestry cases and controls
2011-04-11	21378988	The Coronary Artery Disease (C4D) Genetics Consortium	2011-03-06	Nat Genet	http://www.ncbi.nlm.nih.gov/pubmed/21378988	A genome-wide association study in Europeans and South Asians identifies five new loci for coronary artery disease.	Coronary heart disease	8,424 European ancestry cases, 7,268 European ancestry controls, 6,996 South Asian ancestry cases, 7,794 South Asian ancestry controls	18,049 European ancestry cases, 16,357 European ancestry controls, 3,359 South Asian ancestry cases, 2,828 South Asian ancestry controls
2011-06-04	21606135	Wild PS	2011-05-23	Circ Cardiovasc Genet	http://www.ncbi.nlm.nih.gov/pubmed/21606135	A genome-wide association study identifies LIPA as a susceptibility gene for coronary artery disease.	Coronary heart disease	2,078 European ancestry cases, 2,953 European ancestry controls	19,350 European ancestry cases, 35,408 European ancestry controls
2011-11-03	21971053	Takeuchi F	2011-10-05	Eur J Hum Genet	http://www.ncbi.nlm.nih.gov/pubmed/21971053	Genome-wide association study of coronary artery disease in the Japanese.	Coronary heart disease	806 Japanese ancestry cases, 1,337 Japanese ancestry controls	3,593 Japanese ancestry cases, 6,335 Japanese ancestry controls
2012-08-08	22745674	Hager J	2012-06-20	PLoS One	http://www.ncbi.nlm.nih.gov/pubmed/22745674	Genome-wide association study in a Lebanese cohort confirms PHACTR1 as a major determinant of coronary artery stenosis.	Coronary heart disease	1,949 Middle Eastern ancestry individuals	2,547 Middle Eastern ancestry individuals
2012-09-20	22751097	Lu X	2012-07-01	Nat Genet	http://www.ncbi.nlm.nih.gov/pubmed/22751097	Genome-wide association study in Han Chinese identifies four new susceptibility loci for coronary artery disease.	Coronary heart disease	1,515 Han Chinese ancestry cases, 5,019 Han Chinese ancestry controls	15,460 Han Chinese ancestry cases, 11,472 Han Chinese ancestry controls
2013-05-01	23364394	Lee JY	2013-01-31	J Hum Genet	http://www.ncbi.nlm.nih.gov/pubmed/23364394	A genome-wide association study of a coronary artery disease risk variant.	Coronary heart disease	2,123 Korean ancestry cases; 3,591 Korean ancestry controls	3,052 Japanese ancestry cases; 4,976 Japanese ancestry controls
2008-11-25	18587394	Barrett JC	2008-06-29	Nat Genet	http://www.ncbi.nlm.nih.gov/pubmed/18587394?ordinalpos=1&itool=EntrezSystem2.PEntrez.Pubmed.Pubmed_ResultsPanel.Pubmed_RVDocSum	Genome-wide association defines more than 30 distinct susceptibility loci for Crohn's disease.	Crohn's disease	3,230 European ancestry cases, 4,829 European ancestry controls	1,339 European ancestry trios, 2,325 European ancestry cases, 1,809 European ancestry controls
2008-11-25	17804789	Raelson JV	2007-09-05	Proc Natl Acad Sci U S A	http://www.ncbi.nlm.nih.gov/pubmed/17804789?ordinalpos=1&itool=EntrezSystem2.PEntrez.Pubmed.Pubmed_ResultsPanel.Pubmed_RVDocSum	Genome-wide association study for Crohn's disease in the Quebec Founder Population identifies multiple validated disease loci.	Crohn's disease	382 French Canadian founder trios	750 European ancestry cases, 828 European ancestry controls, 521 Europeann ancestry trios
2008-11-25	17684544	Franke A	2007-08-08	PLoS One	http://www.ncbi.nlm.nih.gov/pubmed/17684544?ordinalpos=6&itool=EntrezSystem2.PEntrez.Pubmed.Pubmed_ResultsPanel.Pubmed_RVDocSum	Systematic association mapping identifies NELL1 as a novel IBD disease gene.	Crohn's disease	393 European ancestry cases, 399 European ancestry controls	375 European ancestry trios, 1,395 European ancestry cases, 1,603 European ancestry controls, 454 French Canadian founder trios, 466 French Canadian founder cases, 358 French Canadian founder controls
2008-11-25	17554300	WTCCC	2007-06-07	Nature	http://www.ncbi.nlm.nih.gov/pubmed/17554300?ordinalpos=5&itool=EntrezSystem2.PEntrez.Pubmed.Pubmed_ResultsPanel.Pubmed_RVDocSum	Genome-wide association study of 14,000 cases of seven common diseases and 3,000 shared controls.	Crohn's disease	1,748 European ancestry cases, 2,938 European ancestry controls	(see Parkes 2007)
2008-11-25	17554261	Parkes M	2007-06-06	Nat Genet	http://www.ncbi.nlm.nih.gov/pubmed/17554261?ordinalpos=4&itool=EntrezSystem2.PEntrez.Pubmed.Pubmed_ResultsPanel.Pubmed_RVDocSum	Sequence variants in the autophagy gene IRGM and multiple other replicating loci contribute to Crohn's disease susceptibility.	Crohn's disease	1,748 cases, 2,938 controls	1,182 European ancestry cases, 2,024 European ancestry controls
2008-11-25	17435756	Rioux JD	2007-04-15	Nat Genet	http://www.ncbi.nlm.nih.gov/pubmed/17435756?ordinalpos=4&itool=EntrezSystem2.PEntrez.Pubmed.Pubmed_ResultsPanel.Pubmed_RVDocSum	Genome-wide association study identifies new susceptibility loci for Crohn disease and implicates autophagy in disease pathogenesis.	Crohn's disease	946 cases, 977 controls	530 trios, 353 cases, 207 controls
2008-11-25	17447842	Libioulle C	2007-03-05	PLoS Genet	http://www.ncbi.nlm.nih.gov/pubmed/17447842	Novel Crohn disease locus identified by genome-wide association maps to a gene desert on 5p13.1 and modulates expression of PTGER4.	Crohn's disease	547 European ancestry cases, 928 European ancestry controls	1,266 European ancestry cases, 559 European ancestry controls, Up to 428 European ancestry trios
2010-07-12	20570966	McGovern DP	2010-06-22	Hum Mol Genet	http://www.ncbi.nlm.nih.gov/pubmed/20570966	Fucosyltransferase 2 (FUT2) non-secretor status is associated with Crohn's disease.	Crohn's disease	896 European ancestry cases, 3,204 European ancestry controls	1,174 European ancestry cases, 357 European ancestry controls
2012-04-03	22412388	Kenny EE	2012-03-08	PLoS Genet	http://www.ncbi.nlm.nih.gov/pubmed/22412388	A genome-wide scan of Ashkenazi Jewish Crohn's disease suggests novel susceptibility loci.	Crohn's disease	737 Ashkenazi Jewish cases, 2,257 Ashkenazi Jewish controls	971 Ashkenazi Jewish cases, 2,124 Ashkenazi Jewish controls
2012-10-19	21102463	Franke A	2010-11-21	Nat Genet	http://www.ncbi.nlm.nih.gov/pubmed/21102463	Genome-wide meta-analysis increases to 71 the number of confirmed Crohn's disease susceptibility loci.	Crohn's disease	6,333 European ancestry cases, 15,056 European ancestry controls	15,694 European ancestry cases, 14,026 European ancestry controls, 414 European ancestry trios
2012-11-16	22936669	Julia A	2012-08-30	Gut	http://www.ncbi.nlm.nih.gov/pubmed/22936669	A genome-wide association study on a southern European population identifies a new Crohn's disease susceptibility locus at RBX1-EP300.	Crohn's disease	1,277 European ancestry cases, 1,488 European ancestry controls	1,365 European ancestry cases, 1,396 European ancestry controls
2013-02-12	23128233	Jostins L	2012-11-01	Nature	http://www.ncbi.nlm.nih.gov/pubmed/23128233	Host-microbe interactions have shaped the genetic architecture of inflammatory bowel disease.	Crohn's disease	Up to 12,924 European ancestry cases, up to 21,442 European ancestry controls	Up to 25,683 European ancestry cases, up to 17,015 European ancestry controls
2013-02-27	23266558	Yamazaki K	2012-12-21	Gastroenterology	http://www.ncbi.nlm.nih.gov/pubmed/23266558	A genome-wide association study identifies 2 susceptibility Loci for Crohn's disease in a Japanese population.	Crohn's disease	372 Japanese ancestry cases,3,389 Japanese ancestry controls	Up to 1,151 Japanese ancestry cases, up to 15,800 Japanese ancestry controls
2014-02-04	23850713	Yang SK	2013-07-14	Gut	http://www.ncbi.nlm.nih.gov/pubmed/23850713	Genome-wide association study of Crohn's disease in Koreans revealed three new susceptibility loci and common attributes of genetic susceptibility across ethnic populations.	Crohn's disease	532 Korean ancestry cases, 733 Korean ancestry controls	1,779 Korean ancestry cases, 1,709 Korean ancestry controls
2008-11-25	17660530	Hafler DA	2007-07-29	N Engl J Med	http://www.ncbi.nlm.nih.gov/pubmed/17660530?ordinalpos=2&itool=EntrezSystem2.PEntrez.Pubmed.Pubmed_ResultsPanel.Pubmed_RVDocSum	Risk alleles for multiple sclerosis identified by a genomewide study.	Multiple sclerosis	931 European ancestry trios, 2,431 European ancestry controls	609 European ancestry trios, 2,322 European ancestry cases, 2,987 European ancestry controls
2008-12-09	18997785	Aulchenko YS	2008-11-09	Nat Genet	http://www.ncbi.nlm.nih.gov/pubmed/18997785?ordinalpos=&itool=EntrezSystem2.PEntrez.Pubmed.Pubmed_ResultsPanel.SmartSearch&log$=citationsensor	Genetic variation in the KIF1B locus influences susceptibility to multiple sclerosis.	Multiple sclerosis	45 European ancestry cases,195 European ancestry controls	1,316 European ancestry cases, 1,423 European ancestry controls, 1,318 cases and 1,507 controls from 756 families
2009-01-16	19010793	Baranzini SE	2008-11-14	Hum Mol Genet	http://www.ncbi.nlm.nih.gov/pubmed/19010793?ordinalpos=2&itool=EntrezSystem2.PEntrez.Pubmed.Pubmed_ResultsPanel.Pubmed_DefaultReportPanel.Pubmed_RVDocSum	Genome-wide association analysis of susceptibility and clinical phenotype in multiple sclerosis.	Multiple sclerosis	978 European ancestry cases, 883 European ancestry controls	NA
2009-06-29	19525953	De Jager PL	2009-06-14	Nat Genet	http://www.ncbi.nlm.nih.gov/pubmed/19525953?ordinalpos=2&itool=EntrezSystem2.PEntrez.Pubmed.Pubmed_ResultsPanel.Pubmed_DefaultReportPanel.Pubmed_RVDocSum	Meta-analysis of genome scans and replication identify CD6, IRF8 and TNFRSF1A as new multiple sclerosis susceptibility loci.	Multiple sclerosis	2,624 European ancestry cases, 7,220 European ancestry controls	2,215 European ancestry cases, 2,116 European ancestry controls
2009-06-30	19525955	Bahlo	2009-06-14	Nat Genet	http://www.ncbi.nlm.nih.gov/pubmed/19525955?ordinalpos=1&itool=EntrezSystem2.PEntrez.Pubmed.Pubmed_ResultsPanel.Pubmed_DefaultReportPanel.Pubmed_RVDocSum	Genome-wide association study identifies new multiple sclerosis susceptibility loci on chromosomes 12 and 20.	Multiple sclerosis	1,618 European ancestry cases, 3,413 European ancestry controls	2,256 European ancestry cases, 2,310 European ancestry controls
2010-03-07	20159113	Jakkula E	2010-02-12	Am J Hum Genet	http://www.ncbi.nlm.nih.gov/pubmed/20159113?itool=EntrezSystem2.PEntrez.Pubmed.Pubmed_ResultsPanel.Pubmed_RVDocSum&ordinalpos=1	Genome-wide association study in a high-risk isolate for multiple sclerosis reveals associated variants in STAT3 gene.	Multiple sclerosis	68 Finland founder cases, 136 Finland founder controls	83 Finland founder cases, 365 Finland founder controls 3,285 European ancestry cases, 6,379 European ancestry controls, 1,202 cases, 3,399 controls
2010-06-08	20453840	Sanna S	2010-05-09	Nat Genet	http://www.ncbi.nlm.nih.gov/pubmed/20453840	Variants within the immunoregulatory CBLB gene are associated with multiple sclerosis.	Multiple sclerosis	882 Sardinian cases, 872 Sardinian controls	1,775 Sardinian cases, 2,005 Sardinian controls
2011-06-25	21654844	Briggs FB	2011-06-09	Genes Immun	http://www.ncbi.nlm.nih.gov/pubmed/21654844	Genome-wide association study of severity in multiple sclerosis.	Multiple sclerosis	1,470 European ancestry cases	NA
2012-01-17	22190364	Patsopoulos NA	2011-12-01	Ann Neurol	http://www.ncbi.nlm.nih.gov/pubmed/22190364	Genome-wide meta-analysis identifies novel multiple sclerosis susceptibility loci.	Multiple sclerosis	5,545 European ancestry cases, 12,153 European ancestry controls	NA
2012-05-11	22457343	Martinelli-Boneschi F	2012-03-28	Mult Scler	http://www.ncbi.nlm.nih.gov/pubmed/22457343	A genome-wide association study in progressive multiple sclerosis.	Multiple sclerosis	197 European ancestry cases, 234 European ancestry controls	379 European ancestry cases, 398 European ancestry controls
2009-09-04	19648918	Amundadottir L	2009-08-02	Nat Genet	http://www.ncbi.nlm.nih.gov/pubmed/19648918?ordinalpos=1&itool=EntrezSystem2.PEntrez.Pubmed.Pubmed_ResultsPanel.Pubmed_DefaultReportPanel.Pubmed_RVDocSum	Genome-wide association study identifies variants in the ABO locus associated with susceptibility to pancreatic cancer.	Pancreatic cancer	1,771 European ancestry cases, 1,805 European ancestry controls	2,120 European ancestry cases, 2,127 European ancestry controls
2010-02-28	20101243	Petersen GM	2010-01-24	Nat Genet	http://www.ncbi.nlm.nih.gov/pubmed/20101243?itool=EntrezSystem2.PEntrez.Pubmed.Pubmed_ResultsPanel.Pubmed_RVDocSum&ordinalpos=11	A genome-wide association study identifies pancreatic cancer susceptibility loci on chromosomes 13q22.1, 1q32.1 and 5p15.33.	Pancreatic cancer	3,851 European, Chinese and other ancestry cases, 3,934 European, Chinese and other ancestry controls	NA
2010-09-10	20686608	Low SK	2010-07-29	PLoS One	http://www.ncbi.nlm.nih.gov/pubmed/20686608	Genome-wide association study of pancreatic cancer in Japanese population.	Pancreatic cancer	991 Japanese ancestry cases, 5,209 Japanese ancestry controls	NA
2012-01-18	22158540	Wu C	2011-12-11	Nat Genet	http://www.ncbi.nlm.nih.gov/pubmed/22158540	Genome-wide association study identifies five loci associated with susceptibility to pancreatic cancer in Chinese populations.	Pancreatic cancer	981 Han Chinese ancestry cases, 1,991 Han Chinese ancestry controls	2,603 Han Chinese ancestry cases, 2,877 Han Chinese ancestry controls
2013-02-13	23180869	Wu C	2012-11-24	Gut	http://www.ncbi.nlm.nih.gov/pubmed/23180869	Genome-wide association study of survival in patients with pancreatic adenocarcinoma.	Pancreatic cancer	642 European ancestry cases	363 Chinese ancestry cases
2009-12-10	19915575	Simon-Sanchez J	2009-11-15	Nat Genet	http://www.ncbi.nlm.nih.gov/pubmed/19915575?itool=EntrezSystem2.PEntrez.Pubmed.Pubmed_ResultsPanel.Pubmed_RVDocSum&ordinalpos=1	Genome-wide association study reveals genetic risk underlying Parkinson's disease.	Parkinson's disease	1,713 European ancestry cases, 3,978 European ancestry controls	3,361 European ancestry cases, 4,573 European ancestry controls
2010-09-22	20711177	Hamza TH	2010-08-15	Nat Genet	http://www.ncbi.nlm.nih.gov/pubmed/20711177	Common genetic variation in the HLA region is associated with late-onset sporadic Parkinson's disease.	Parkinson's disease	2,000 European ancestry cases, 1,986 European ancestry controls	Up to 1,447 cases, 1,468 controls
2011-01-03	21044948	Spencer CC	2010-11-02	Hum Mol Genet	http://www.ncbi.nlm.nih.gov/pubmed/21044948	Dissection of the genetics of Parkinson's disease identifies an additional association 5' of SNCA and multiple associated haplotypes at 17q21.	Parkinson's disease	1,705 European ancestry cases, 5,175 European ancestry controls	1,039 European ancestry cases, 1,984 European ancestry controls
2011-01-06	21084426	Saad M	2010-11-17	Hum Mol Genet	http://www.ncbi.nlm.nih.gov/pubmed/21084426	Genome-wide association study confirms BST1 and suggests a locus on 12q24 as the risk loci for Parkinson's disease in the European population.	Parkinson's disease	1,039 European ancestry cases, 1,984 European ancestry controls	3,232 European ancestry cases, 7,064 European ancestry controls
2011-03-18	21292315	Nalls MA	2011-02-01	Lancet	http://www.ncbi.nlm.nih.gov/pubmed/21292315	Imputation of sequence variants for identification of genetic risks for Parkinson's disease: a meta-analysis of genome-wide association studies.	Parkinson's disease	5,333 European ancestry cases, 12,019 European ancestry controls	7,053 European ancestry cases, 9,007 European ancestry controls
2011-07-20	21738487	Do CB	2011-06-23	PLoS Genet	http://www.ncbi.nlm.nih.gov/pubmed/21738487	Web-based genome-wide association study identifies two novel loci and a substantial genetic component for Parkinson's disease.	Parkinson's disease	3,426 European ancestry cases, 29,624 European ancestry controls	NA
2011-09-14	21812969	Liu X	2011-08-03	BMC Med Genet	http://www.ncbi.nlm.nih.gov/pubmed/21812969	Genome-wide association study identifies candidate genes for Parkinson's disease in an Ashkenazi Jewish population.	Parkinson's disease	268 Ashkenazi Jewish cases, 178 Ashkenazi Jewish controls	1,782 European ancestry cases, 1,658 European ancestry controls
2012-05-18	22438815	Lill CM	2012-03-15	PLoS Genet	http://www.ncbi.nlm.nih.gov/pubmed/22438815	Comprehensive research synopsis and systematic meta-analyses in Parkinson's disease genetics: The PDGene database.	Parkinson's disease	2,197 cases, 2,061 controls	Up to 98,080 European and Asian ancestry individuals
2013-12-20	23793441	Davis MF	2013-06-21	Hum Genet	http://www.ncbi.nlm.nih.gov/pubmed/23793441	Parkinson disease loci in the mid-western Amish.	Parkinson's disease	31 Amish cases, 767 Amish controls	NA
2014-10-21	24511991	Hill-Burns EM	2014-02-10	BMC Genomics	http://www.ncbi.nlm.nih.gov/pubmed/24511991	Identification of a novel Parkinson's disease locus via stratified genome-wide association study.	Parkinson's disease	1,565 European ancestry sproadic Parkinson's disease cases, 435 European ancestry familial Parkinson's disease cases, 1,986 European ancestry controls	1,528 European ancestry sporadic Parkinson's disease cases, 707 European ancestry familial Parkinson's disease cases, 796 European ancestry controls
2014-12-05	24842889	Vacic V	2014-05-19	Hum Mol Genet	www.ncbi.nlm.nih.gov/pubmed/24842889	Genome-wide mapping of IBD segments in an Ashkenazi PD cohort identifies associated haplotypes.	Parkinson's disease	1,130 Ashkenazi Jewish cases, 2,611 Ashkenazi Jewish controls	306 Ashkenazi Jewish cases, 2,583 Ashkenazi Jewish controls
2008-11-25	18264097	Eeles RA	2008-02-10	Nat Genet	http://www.ncbi.nlm.nih.gov/pubmed/18264097?ordinalpos=3&itool=EntrezSystem2.PEntrez.Pubmed.Pubmed_ResultsPanel.Pubmed_RVDocSum	Multiple newly identified loci associated with prostate cancer susceptibility.	Prostate cancer	1,854 European ancestry cases, 1,894 European ancestry controls	3,268 European ancestry cases, 3,366 European ancestry controls
2008-11-25	18264098	Gudmundsson J	2008-02-10	Nat Genet	http://www.ncbi.nlm.nih.gov/pubmed/18264098?ordinalpos=1&itool=EntrezSystem2.PEntrez.Pubmed.Pubmed_ResultsPanel.Pubmed_RVDocSum	Common sequence variants on 2p15 and Xp11.22 confer susceptibility to prostate cancer.	Prostate cancer	1,854 European ancestry cases, 21,372 European ancestry controls	8,239 European ancestry cases, 7,590 European ancestry controls
2008-11-25	18264096	Thomas G	2008-02-10	Nat Genet	http://www.ncbi.nlm.nih.gov/pubmed/18264096?ordinalpos=6&itool=EntrezSystem2.PEntrez.Pubmed.Pubmed_ResultsPanel.Pubmed_RVDocSum	Multiple loci identified in a genome-wide association study of prostate cancer.	Prostate cancer	1,172 European ancestry cases, 1,157 European ancestry controls	3,941 European ancestry cases, 3,964 European ancestry controls
2008-11-25	17603485	Gudmundsson J	2007-07-01	Nat Genet	http://www.ncbi.nlm.nih.gov/pubmed/17603485?ordinalpos=1&itool=EntrezSystem2.PEntrez.Pubmed.Pubmed_ResultsPanel.Pubmed_RVDocSum	Two variants on chromosome 17 confer prostate cancer risk, and the one in TCF2 protects against type 2 diabetes.	Prostate cancer	1,501 European ancestry cases, 11,290 European ancestry controls	1,992 European ancestry cases, 3,058 European ancestry controls
2008-11-25	17401366	Gudmundsson J	2007-04-01	Nat Genet	http://www.ncbi.nlm.nih.gov/pubmed/17401366?ordinalpos=26&itool=EntrezSystem2.PEntrez.Pubmed.Pubmed_ResultsPanel.Pubmed_RVDocSum	Genome-wide association study identifies a second prostate cancer susceptibility variant at 8q24.	Prostate cancer	1,453 European ancestry cases, 3,064 European ancestry controls	1,210 European ancestry cases, 2,445 European ancestry controls; 373 African American cases, 372 African American controls
2008-11-25	17401363	Yeager M	2007-04-01	Nat Genet	http://www.ncbi.nlm.nih.gov/pubmed/17401363?ordinalpos=5&itool=EntrezSystem2.PEntrez.Pubmed.Pubmed_ResultsPanel.Pubmed_RVDocSum	Genome-wide association study of prostate cancer identifies a second risk locus at 8q24.	Prostate cancer	1,172 European ancestry cases, 1,157 European ancestry controls	3,124 European ancestry cases, 3,142 European ancestry controls
2009-02-26	19117981	Sun J	2009-01-01	Cancer Res	http://www.ncbi.nlm.nih.gov/pubmed/19117981?ordinalpos=3&itool=EntrezSystem2.PEntrez.Pubmed.Pubmed_ResultsPanel.Pubmed_DefaultReportPanel.Pubmed_RVDocSum	Sequence variants at 22q13 are associated with prostate cancer risk.	Prostate cancer	1,235 European ancestry aggressive cases, 1,599 European ancestry controls	1,215 European ancestry aggressive cases, 2,213 European ancestry non-aggressive cases, 1,208 European ancestry controls, 1,034 aggressive cases, 921 non-aggressive cases, 2,231 controls
2009-10-05	19767754	Gudmundsson J	2009-09-20	Nat Genet	http://www.ncbi.nlm.nih.gov/pubmed/19767754?ordinalpos=2&itool=EntrezSystem2.PEntrez.Pubmed.Pubmed_ResultsPanel.Pubmed_DefaultReportPanel.Pubmed_RVDocSum	Genome-wide association and replication studies identify four variants associated with prostate cancer susceptibility.	Prostate cancer	Up to 1,968 European ancestry cases, 35,382 European ancestry controls	Up to 11,806 European ancestry cases, 12,387 European ancestry controls
2009-12-29	19767753	Eeles RA	2009-09-20	Nat Genet	http://www.ncbi.nlm.nih.gov/pubmed/19767753	Identification of seven new prostate cancer susceptibility loci through a genome-wide association study.	Prostate cancer	1,854 European ancestry cases, 1,894 European ancestry controls	19,879 cases and 18,761 controls of European, East Asian, African American, Latino, and Hawaiian ancestry
2010-09-11	20676098	Takata R	2010-08-01	Nat Genet	http://www.ncbi.nlm.nih.gov/pubmed/20676098	Genome-wide association study identifies five new susceptibility loci for prostate cancer in the Japanese population.	Prostate cancer	1,583 Japanese ancestry cases, 3,386 Japanese ancestry controls	3,001 Japanese ancestry cases, 5,415 Japanese ancestry controls
2011-06-03	21602798	Haiman CA	2011-05-22	Nat Genet	http://www.ncbi.nlm.nih.gov/pubmed/21602798	Genome-wide association study of prostate cancer in men of African ancestry identifies a susceptibility locus at 17q21.	Prostate cancer	3,425 African American cases, 3,290 African American controls	1,500 African American/Afro-Caribbean cases, 1,908 African American/Afro-Caribbean controls, 344 Sub-Saharan African ancestry cases, 1,361 Sub-Saharan African ancestry controls
2011-07-30	21743057	Schumacher FR	2011-07-08	Hum Mol Genet	http://www.ncbi.nlm.nih.gov/pubmed/21743057	Genome-wide association study identifies new prostate cancer susceptibility loci.	Prostate cancer	2,782 European ancestry cases, 4,458 European ancestry controls	7,358 European ancestry cases, 6,732 European ancestry controls
2011-08-22	21743467	Kote-Jarai Z	2011-07-10	Nat Genet	http://www.ncbi.nlm.nih.gov/pubmed/21743467	Seven prostate cancer susceptibility loci identified by a multi-stage genome-wide association study.	Prostate cancer	6,621 European ancestry cases, 6,939 European ancestry controls	22,957 European ancestry cases, 23,234 European ancestry controls, 420 East Asian ancestry cases, 433 East Asian ancestry controls, 112 African American cases, 298 African American controls, 7,140 cases, 5,455 controls
2012-10-23	22923026	Cheng I	2012-08-24	Cancer Epidemiol Biomarkers Prev	http://www.ncbi.nlm.nih.gov/pubmed/22923026	Evaluating genetic risk for prostate cancer among Japanese and Latinos.	Prostate cancer	1,033 Japanese ancestry cases, 1,042 Japanese ancestry controls, 1,043 Latino cases, 1,057 Latino controls	1,583 Japanese ancestry cases, 3,386 Japanese ancestry controls, 1,854 European ancestry cases, 3,748 European ancestry controls
2012-12-11	23023329	Xu J	2012-09-30	Nat Genet	http://www.ncbi.nlm.nih.gov/pubmed/23023329	Genome-wide association study in Chinese men identifies two new prostate cancer risk loci at 9q31.2 and 19q13.4.	Prostate cancer	1,417 Han Chinese ancestry cases, 1,008 Han Chinese ancestry controls	3,067 Han Chinese ancestry cases, 7,926 Han Chinese ancestry controls
2013-09-16	23535732	Eeles RA	2013-04-01	Nat Genet	http://www.ncbi.nlm.nih.gov/pubmed/23535732	Identification of 23 new prostate cancer susceptibility loci using the iCOGS custom genotyping array.	Prostate cancer	11,085 European ancestry cases, 11,463 European ancestry controls	19,662 European ancestry cases, 19,715 European ancestry controls
2008-11-25	18677311	O'Donovan MC	2008-07-30	Nat Genet	http://www.ncbi.nlm.nih.gov/pubmed/18677311?ordinalpos=1&itool=EntrezSystem2.PEntrez.Pubmed.Pubmed_ResultsPanel.Pubmed_RVDocSum	Identification of loci associated with schizophrenia by genome-wide association and follow-up.	Schizophrenia	479 European ancestry cases, 2,937 European ancestry controls	4,143 European ancestry cases, 6,515 European ancestry controls, 1,782 East Asian ancestry cases, 1,865 East Asian ancestry controls, 741 cases, 1,517 controls
2008-11-25	18347602	Sullivan PF	2008-03-18	Mol Psychiatry	http://www.ncbi.nlm.nih.gov/pubmed/18347602?ordinalpos=3&itool=EntrezSystem2.PEntrez.Pubmed.Pubmed_ResultsPanel.Pubmed_DefaultReportPanel.Pubmed_RVDocSum	Genomewide association for schizophrenia in the CATIE study: results of stage 1.	Schizophrenia	417 European ancestry cases, 411 European ancestry controls, 217 African American cases, 219 African American controls, 104 American Indian, Asian, Pacific Islander, and Hispanic/Latino ancestry cases, 103 American Indian, Asian, Pacific Islander, or Hispanic/Latino ancestry controls	NA
2008-11-25	18332876	Kirov G	2008-03-11	Mol Psychiatry	http://www.ncbi.nlm.nih.gov/pubmed/18332876?ordinalpos=1&itool=EntrezSystem2.PEntrez.Pubmed.Pubmed_ResultsPanel.Pubmed_RVDocSum	A genome-wide association study in 574 schizophrenia trios using DNA pooling.	Schizophrenia	574 European ancestry trios, 605 European ancestry controls	NA
2008-11-25	18282107	Shifman S	2008-02-15	PLoS Genet	http://www.ncbi.nlm.nih.gov/pubmed/18282107?ordinalpos=1&itool=EntrezSystem2.PEntrez.Pubmed.Pubmed_ResultsPanel.Pubmed_RVDocSum	Genome-wide association identifies a common variant in the reelin gene that increases the risk of schizophrenia only in women.	Schizophrenia	660 Ashkenazi Jewish cases, 2,271 Ashkenazi Jewish controls	1,859 European ancestry cases, 3,943 European ancestry controls, 759 Ashkenazi Jewish cases, 3,389 Ashkenazi Jewish controls, 415 Han Chinese ancestry cases, 458 Han Chinese ancestry controls
2009-07-10	19571809	Shi J	2009-07-01	Nature	http://www.ncbi.nlm.nih.gov/pubmed/19571809	Common variants on chromosome 6p22.1 are associated with schizophrenia.	Schizophrenia	2,681 European ancestry cases, 2,653 European ancestry controls, 1,286 African American cases, 973 African American controls	5,327 European ancestry cases, 16,424 European ancestry controls
2009-07-10	19571808	Stefansson H	2009-07-01	Nature	http://www.ncbi.nlm.nih.gov/pubmed/19571808	Common variants conferring risk of schizophrenia.	Schizophrenia	2,663 European ancestry cases, 13,498 European ancestry controls	10,282 European ancestry cases, 21,093 European ancestry controls
2009-07-13	19571811	Purcell SM	2009-07-01	Nature	http://www.ncbi.nlm.nih.gov/pubmed/19571811	Common polygenic variation contributes to risk of schizophrenia and bipolar disorder.	Schizophrenia	3,322 European ancestry cases, 3,587 European ancestry controls	4,692 European ancestry cases, 15,493 European ancestry controls
2011-07-08	21682944	Alkelai A	2011-06-20	Int J Neuropsychopharmacol	http://www.ncbi.nlm.nih.gov/pubmed/21682944	DOCK4 and CEACAM21 as novel schizophrenia candidate genes in the Jewish population.	Schizophrenia	155 Jewish-Israeli ancestry cases and 176 Jewish-Israeli ancestry controls from 107 families	99 Arab-Israeli ancestry cases and 99 Arab-Israeli ancestry controls from 57 families
2011-07-08	21679298	Ma X	2011-06-16	Genes Brain Behav	http://www.ncbi.nlm.nih.gov/pubmed/21679298	A genome-wide association study for quantitative traits in schizophrenia in China.	Schizophrenia	98 Chinese ancestry cases, 60 Chinese ancestry controls	NA
2011-10-17	21926974	Ripke S	2011-09-18	Nat Genet	http://www.ncbi.nlm.nih.gov/pubmed/21926974	Genome-wide association study identifies five new schizophrenia loci.	Schizophrenia	9,394 European ancestry cases, 12,462 European ancestry controls	8,442 European ancestry cases, 21,397 European ancestry controls
2011-12-15	22037555	Shi Y	2011-10-30	Nat Genet	http://www.ncbi.nlm.nih.gov/pubmed/22037555	Common variants on 8p12 and 1q24.2 confer risk of schizophrenia.	Schizophrenia	3,750 Han Chinese ancestry cases, 6,468 Han Chinese ancestry controls	4,383 Han Chinese ancestry cases, 4,539 Han Chinese ancestry controls
2012-09-29	22883433	Irish Schizophrenia Genomics Consortium & the Wellcome Trust Case Control Consortium 2	2012-08-07	Biol Psychiatry	http://www.ncbi.nlm.nih.gov/pubmed/22883433	Genome-wide association study implicates HLA-C*01:02 as a risk factor at the major histocompatibility complex locus in schizophrenia.	Schizophrenia	1,606 European ancestry cases, 1,794 European ancestry controls	13,195 European ancestry cases, 31,021 European ancestry controls
2013-05-02	23358160	Borglum AD	2013-01-29	Mol Psychiatry	http://www.ncbi.nlm.nih.gov/pubmed/23358160	Genome-wide study of association and interaction with maternal cytomegalovirus infection suggests new schizophrenia loci.	Schizophrenia	888 European ancestry cases, 882 European ancestry controls	2539 European ancestry cases, 5486 European ancestry controls
2013-05-08	23894747	Aberg KA	2013-02-01	JAMA Psychiatry	http://www.ncbi.nlm.nih.gov/pubmed/23894747	A comprehensive family-based replication study of schizophrenia genes.	Schizophrenia	11,185 European ancestry cases, 10,768 European ancestry controls	1,262 African American ancestry individuals, 2,740 European ancestry individuals, 2,296 Asian ancestry individuals
2014-03-18	23974872	Ripke S	2013-08-25	Nat Genet	http://www.ncbi.nlm.nih.gov/pubmed/23974872	Genome-wide association analysis identifies 13 new risk loci for schizophrenia.	Schizophrenia	5,001 European ancestry cases, 6,243 European ancestry controls, 8,832 cases, 12,067 controls	4,801 European ancestry cases, 4,741 European ancestry controls, 2,612 European and unknown ancestry cases, 15,021 European and unknown ancestry controls, 581 trios
2008-11-25	19165918	Graham RR	2008-08-01	Nat Genet	http://www.ncbi.nlm.nih.gov/pubmed/19165918	Genetic variants near TNFAIP3 on 6q23 are associated with systemic lupus erythematosus.	Systemic lupus erythematosus	431 European ancestry cases, 2,155 European ancestry controls	447 European ancestry trios, 293 trios
2008-11-25	18204446	Harley JB	2008-01-20	Nat Genet	http://www.ncbi.nlm.nih.gov/pubmed/18204446?ordinalpos=1&itool=EntrezSystem2.PEntrez.Pubmed.Pubmed_ResultsPanel.Pubmed_RVDocSum	Genome-wide association scan in women with systemic lupus erythematosus identifies susceptibility variants in ITGAM, PXK, KIAA1542 and other loci.	Systemic lupus erythematosus	720 European ancestry female cases, 2,337 European ancestry female controls	1,846 European ancestry female cases, 1,825 European ancestry female controls
2008-11-25	18204098	Hom G	2008-01-20	N Engl J Med	http://www.ncbi.nlm.nih.gov/pubmed/18204098?ordinalpos=3&itool=EntrezSystem2.PEntrez.Pubmed.Pubmed_ResultsPanel.Pubmed_RVDocSum	Association of systemic lupus erythematosus with C8orf13-BLK and ITGAM-ITGAX.	Systemic lupus erythematosus	1,311 European ancestry cases, 3,340 European ancestry controls	793 European ancestry cases, 857 European ancestry controls
2008-11-25	18204447	Kozyrev SV	2008-01-20	Nat Genet	http://www.ncbi.nlm.nih.gov/pubmed/18204447?ordinalpos=1&itool=EntrezSystem2.PEntrez.Pubmed.Pubmed_ResultsPanel.Pubmed_RVDocSum	Functional variants in the B-cell gene BANK1 are associated with systemic lupus erythematosus.	Systemic lupus erythematosus	279 European ancestry cases, 515 European ancestry controls	1,757 European ancestry cases, 1,540 European ancestry controls
2009-11-09	19838193	Han JW	2009-10-18	Nat Genet	http://www.ncbi.nlm.nih.gov/pubmed/19838193?itool=EntrezSystem2.PEntrez.Pubmed.Pubmed_ResultsPanel.Pubmed_RVDocSum&ordinalpos=2	Genome-wide association study in a Chinese Han population identifies nine new susceptibility loci for systemic lupus erythematosus.	Systemic lupus erythematosus	1,047 Han Chinese ancestry cases, 1,205 Han Chinese ancestry controls	3,152 Han Chinese ancestry cases, 7,050 Han Chinese ancestry controls
2010-03-06	20169177	Yang W	2010-02-12	PLoS Genet	http://www.ncbi.nlm.nih.gov/pubmed/20169177?itool=EntrezSystem2.PEntrez.Pubmed.Pubmed_ResultsPanel.Pubmed_RVDocSum&ordinalpos=2	Genome-wide association study in Asian populations identifies variants in ETS1 and WDFY4 associated with systemic lupus erythematosus.	Systemic lupus erythematosus	314 Chinese ancestry cases, 1,484 Chinese ancestry controls	2,630 Chinese ancestry cases, 2,155 Chinese ancestry controls, 314 Thai ancestry cases, 519 Thai ancestry controls
2011-01-03	21044949	Yang J	2010-11-02	Hum Mol Genet	http://www.ncbi.nlm.nih.gov/pubmed/21044949	ELF1 is associated with systemic lupus erythematosus in Asian populations.	Systemic lupus erythematosus	612 Chinese ancestry cases, 1,160 Chinese ancestry controls	2,090 Chinese ancestry cases, 1,981 Chinese ancestry controls, 462 Thai ancestry cases, 951 Thai ancestry controls
2011-04-07	21408207	Chung SA	2011-03-03	PLoS Genet	http://www.ncbi.nlm.nih.gov/pubmed/21408207	Differential genetic associations for systemic lupus erythematosus based on anti-dsDNA autoantibody production.	Systemic lupus erythematosus	811 anti-dsDNA positive European ancestry cases, 906 anti-dsDNA negative European ancestry cases, 4,813 European ancestry controls	NA
2012-02-21	22291604	Okada Y	2012-01-26	PLoS Genet	http://www.ncbi.nlm.nih.gov/pubmed/22291604	A genome-wide association study identified AFF1 as a susceptibility locus for systemic lupus eyrthematosus in Japanese.	Systemic lupus erythematosus	891 Japanese ancestry cases, 3,384 Japanese ancestry controls	1,387 Japanese ancestry cases, 28,564 Japanese ancestry controls
2013-02-21	23273568	Yang W	2012-12-27	Am J Hum Genet	http://www.ncbi.nlm.nih.gov/pubmed/23273568	Meta-analysis followed by replication identifies loci in or near CDKN1B, TET3, CD80, DRAM1, and ARID5B as associated with systemic lupus erythematosus in Asians.	Systemic lupus erythematosus	1,656 Han Chinese ancestry cases, 3,394 Han Chinese ancestry controls	3,256 Han Chinese ancestry cases, 5,667 Han Chinese ancestry controls, 453 Thai ancestry cases, 963 Thai ancestry controls
2014-11-26	24871463	Armstrong DL	2014-05-29	Genes Immun	www.ncbi.nlm.nih.gov/pubmed/24871463	GWAS identifies novel SLE susceptibility genes and explains the association of the HLA region.	Systemic lupus erythematosus	725 European ancestry cases, 2,438 European ancestry controls	NA
